# Supplementary material
Source: PubMed Central journal article supplement (PMC3566273)
Supplement: NIHMS383122-supplement-2.pdf [file NIHMS383122-supplement-2.pdf]

# Supplementary Table 1

List of antibodies used in the reverse-phase protein microarray (RPPA) analysis

| Name of the protein      | Antibody source | Catalog number |
|--------------------------|-----------------|----------------|
| 4EBP1                    | CST             | 9452           |
| 4EBP1 pS65               | CST             | 9456           |
| 53BP1                    | CST             | 4937           |
| ACC S79                  | CST             | 3661           |
| ACC1                     | Epitomics       | 1768-1         |
| AIB-1                    | BD Biosciences  | 611105         |
| AKT                      | CST             | 9272           |
| AKT S473                 | CST             | 9271           |
| AKT T308                 | CST             | 9275           |
| AMPK                     | CST             | 2532           |
| AMPK T172                | CST             | 2535           |
| Annexin                  | Invitrogen      | 71-3400        |
| AR                       | Epitomics       | 1852-1         |
| Bak                      | Epitomics       | 1542-1         |
| BAX                      | CST             | 2772           |
| Bcl-2                    | Dako M0887      | M0887          |
| Bcl-X                    | Epitomics       | 1018-1         |
| Bcl-xL                   | CST             | 2762           |
| Beclin                   | Santa Cruz      | sc-10086       |
| Bid                      | Epitomics       | 1008-1         |
| BIM                      | Epitomics       | 1036-1         |
| Cadherin-E               | CST             | 4065           |
| Cadherin-N               | CST             | 4061           |
| Cadherin-P               | CST             | 2130           |
| Caspase 3 Active         | Epitomics       | 1476-1         |
| Caspase 7 cleaved Asp198 | CST             | 9491           |
| Catenin Beta             | CST             | 9562           |
| Caveolin1                | CST             | 3238           |
| CD31                     | Dako            | M0823          |
| CDC2                     | CST             | 9112           |
| Chk1                     | CST             | 2345           |
| Chk1 pSer345             | CST             | 2348           |
| Chk2 (1C12)              | CST             | 3440           |
| Chk2 pThr68              | CST             | 2197           |
| cJun P-S73               | CST             | 9164           |
| Claudin7 CLDN7           | Novus NB        | 100-91714      |
| Collagen VI              | Santa Cruz      | SC-20649       |
| Cox-2                    | Epitomics       | 2169-1         |
| Cyclin B1                | Epitomics       | 1495-1         |

|                 |                     |              |
|-----------------|---------------------|--------------|
| Cyclin D1       | Santa Cruz          | SC-718       |
| Cyclin E1       | Santa Cruz          | SC-247       |
| DJ-1            | Abcam               | ab76008      |
| eEF2            | CST                 | 2332         |
| eEF2K           | CST                 | 3692         |
| EGFR            | Santa Cruz          | SC-03        |
| EGFR Y992       | CST                 | 2235         |
| EGFR Y1173      | Epitomics           | 1124         |
| eIF4E           | CST                 | 9742         |
| ER-a S118       | Epitomics           | 1091-1       |
| ERCC1           | Lab Vision          | MS-671-PO    |
| FAK             | Epitomics           | 1700-1       |
| Fibronectin     | Epitomics           | 1574-1       |
| FOXO3a          | CST                 | 9467         |
| FOXO3a S318/321 | CST                 | 9465         |
| Gata3           | BD Biosciences      | 558686       |
| GSK3 S21/S9     | CST                 | 9331         |
| GSK3-Beta       | Santa Cruz          | SC-7291      |
| HER2 pY1248     | Upstate (Millipore) | 06-229       |
| IGFBP2          | CST                 | 3922         |
| IGFR1b          | CST                 | 3027         |
| INPP4B          | Santa Cruz          | SC-12318     |
| IRS-1           | Upstate (Millipore) | 06-248       |
| Jnk2            | CST                 | 4672         |
| Kit-c           | Epitomics           | 1522         |
| K-RAS           | Santa-Cruz          | sc-30 (F234) |
| Ku80            | CST                 | 2180         |
| MAPK P-T202/204 | CST                 | 4377         |
| MEK1            | Epitomics           | 1235-1       |
| MEK1 pS217/221  | CST                 | 9121         |
| MIG-6           | Sigma               | WH0054206M1  |
| Mre11(31H4)     | CST                 | 4847         |
| MSH2            | CST                 | 2850         |
| MSH6            | SDI                 | SDI          |
| Myc             | CST                 | 9402         |
| NF-kB p65       | CST                 | 3033         |
| NF2             | SDI                 | 2271         |
| Notch 1         | CST                 | 3268         |
| Notch3          | Santa Cruz          | sc-5593      |
| p21             | Santa Cruz          | SC-397       |
| p27             | Epitomics           | 1591-1       |
| p27 pT157       | R&D                 | AF1555       |
| p27 pT198       | Abcam               | ab64949      |
| p38 / MAPK      | CST                 | 9212         |
| p38 T180/182    | CST                 | 9211         |
| p53             | CST                 | 9282         |

|                     |                     |                |
|---------------------|---------------------|----------------|
| p70S6K              | Epitomics           | 1494-1         |
| p70S6K T389         | CST                 | 9205           |
| p90 RSK P-T359/S363 | CST                 | 9344           |
| PARP cleaved        | CST                 | 9546           |
| Paxillin            | Epitomics           | 1500-1         |
| PCNA                | Abcam               | ab29           |
| PDK1 P-S241         | CST                 | 3061           |
| Pea15               | CST                 | 2780           |
| Pea15 pS116         | Invitrogen          | 44-836G        |
| PI3K P110a          | CST                 | 4255           |
| PI3K-p85            | Upstate (Millipore) | 06-195         |
| PKC S657            | Upstate (Millipore) | 06-822         |
| PKCa                | Upstate (Millipore) | 05-154         |
| PR                  | Epitomics           | 1483-1         |
| Pras40 pT246        | Biosource           | 441100G        |
| PTCH                | SDI                 | 2113           |
| PTEN                | CST                 | 9552           |
| Rab25               | Covance Custom      | Covance Custom |
| Rad50               | Millipore           | 05-525         |
| Rad51               | Chem Biotech        | na 71          |
| Raf-A pS299         | CST                 | 4431           |
| Raf-B               | Santa Cruz          | sc-5284        |
| Raf-C               | Millipore           | 05-739         |
| Raf-c pS388         | CST                 | 9427           |
| Rb (4H1)            | CST                 | 9309           |
| Rb pS807/811        | CST                 | 9308           |
| S6 S235/236         | CST                 | 2211           |
| S6 S240/244         | CST                 | 2215           |
| Shc pY317           | CST                 | 2431           |
| Smad3               | Epitomics           | 1735-1         |
| Snail               | CST                 | 3895           |
| Src                 | Upstate (Millipore) | 05-184         |
| Src P-Y527          | CST                 | 2105           |
| Src Y416            | CST                 | 2101           |
| Stat3 P-S705        | CST                 | 9131           |
| Stat5               | Epitomics           | 1289-1         |
| Stathmin            | Epitomics           | 1972-1         |
| Tau                 | Upstate (Millipore) | 05-348         |
| Taz                 | Abcam               | ab3961         |
| Taz P-Ser79         | Santa Cruz          | sc-17610       |
| Telomerase          | SDI--GA1706         | GA1706         |
| Transglutaminase    | Lab Vision          | MS-224         |
| Tuberin/TSC2        | Epitomics           | 1613-1         |
| Vasp                | CST                 | 3112           |
| VEGFR2              | CST                 | 2479           |
| Xiap                | CST                 | 2042           |

|                         |            |          |
|-------------------------|------------|----------|
| XRCC1                   | CST        | 2735     |
| Y Box Binding Protein 1 | SDI--      | GA1725   |
| YAP                     | Santa-Cruz | sc-15407 |
| YAP pS127               | CST        | 4911     |
| YB1 pS102               | CST        | 2900     |

---
